# Supplementary material for: Regulation of mitotic spindle assembly factor NuMA by Importin-β
Source: PubMed Central journal article supplement — J Cell Biol. 2017 Nov 6;216(11):3453–62. doi: 10.1083/jcb.201705168 (PMC5674899; doi:10.1083/jcb.201705168), 2017-11-06
Supplement: JCB_201705168_sm.pdf [file JCB_201705168_sm.pdf]

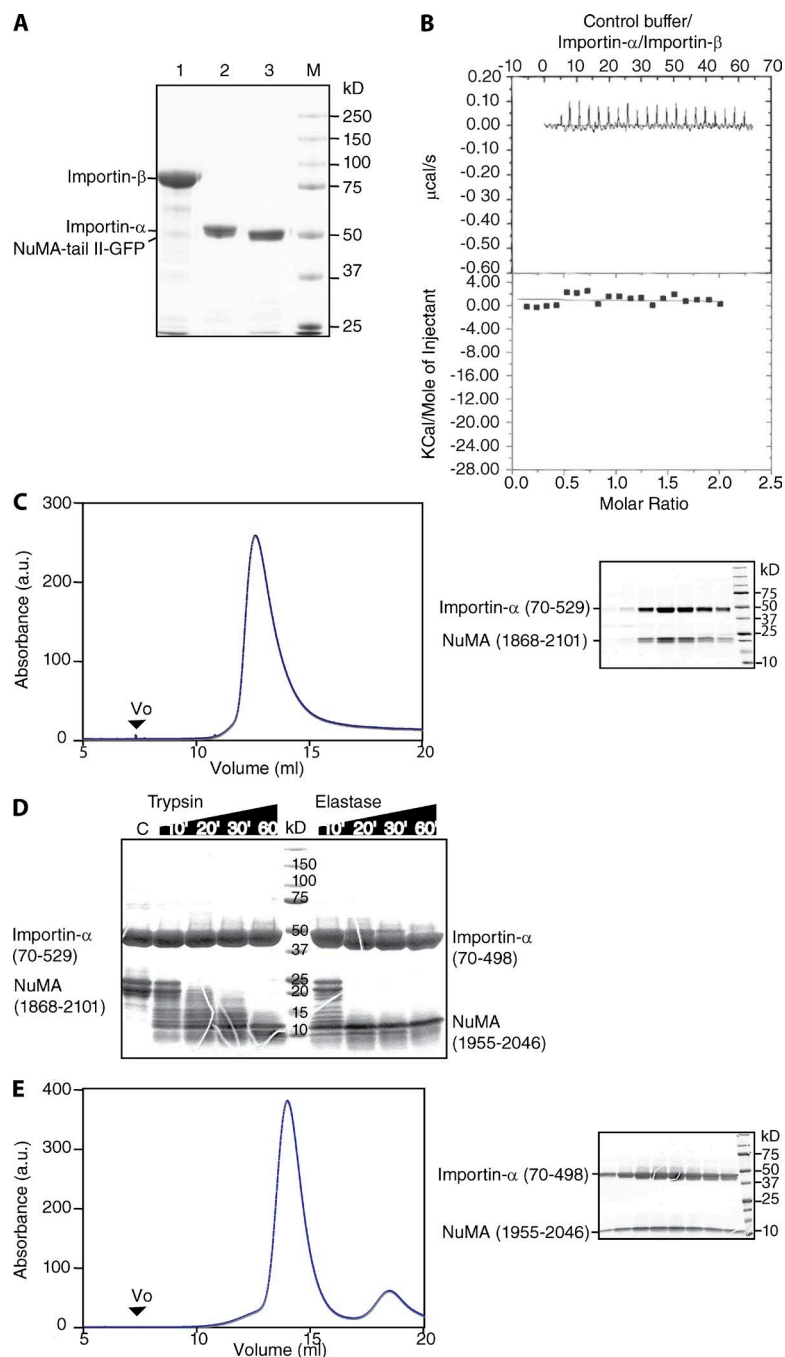

Figure S1. **Identification of suitable regions of the Importin- $\alpha$ –NuMA-tail II complex for crystallographic studies.** (A) Purified recombinant Importin- $\alpha$ , Importin- $\beta$ , and NuMA-tail II-GFP shown in lanes 1, 2, and 3 were analyzed by SDS-PAGE analysis, followed by Coomassie blue staining. (B) ITC titration curves (upper) and binding isotherms (lower) of buffer control in the presence of full-length Importin- $\alpha$ / $\beta$ . (C) Size exclusion chromatography (Superdex 200) elution profile for the NuMA (1,868–2,101)–Importin- $\alpha$  (70–529) dimeric complex. The peak fraction of size exclusion chromatography was analyzed by SDS-PAGE and stained with Coomassie blue (lane 4). Void volume ( $V_0$ ) and absorbance (a.u.) at 280 nm are shown. (D) The NuMA-tail II (aa 1868–2101)–Importin- $\alpha$  (aa 70–529) complex was subjected to limited proteolysis. Protein was incubated with trypsin and elastase over different time courses, and two stable protein fragments could be observed after protease treatment. Protease-digested samples were analyzed by SDS-PAGE analysis, followed by Coomassie blue staining. Different time points of protease treatment are indicated. N and C termini of protein peptides determined by Edman sequencing and mass spectrometry are indicated. (E) A 1-h elastase-treated sample was reanalyzed by size exclusion chromatography (Superdex 200 10/300). Peak fractions were analyzed by SDS-PAGE and stained with Coomassie blue. Void volume ( $V_0$ ) and absorbance (a.u.) at 280 nm are shown.

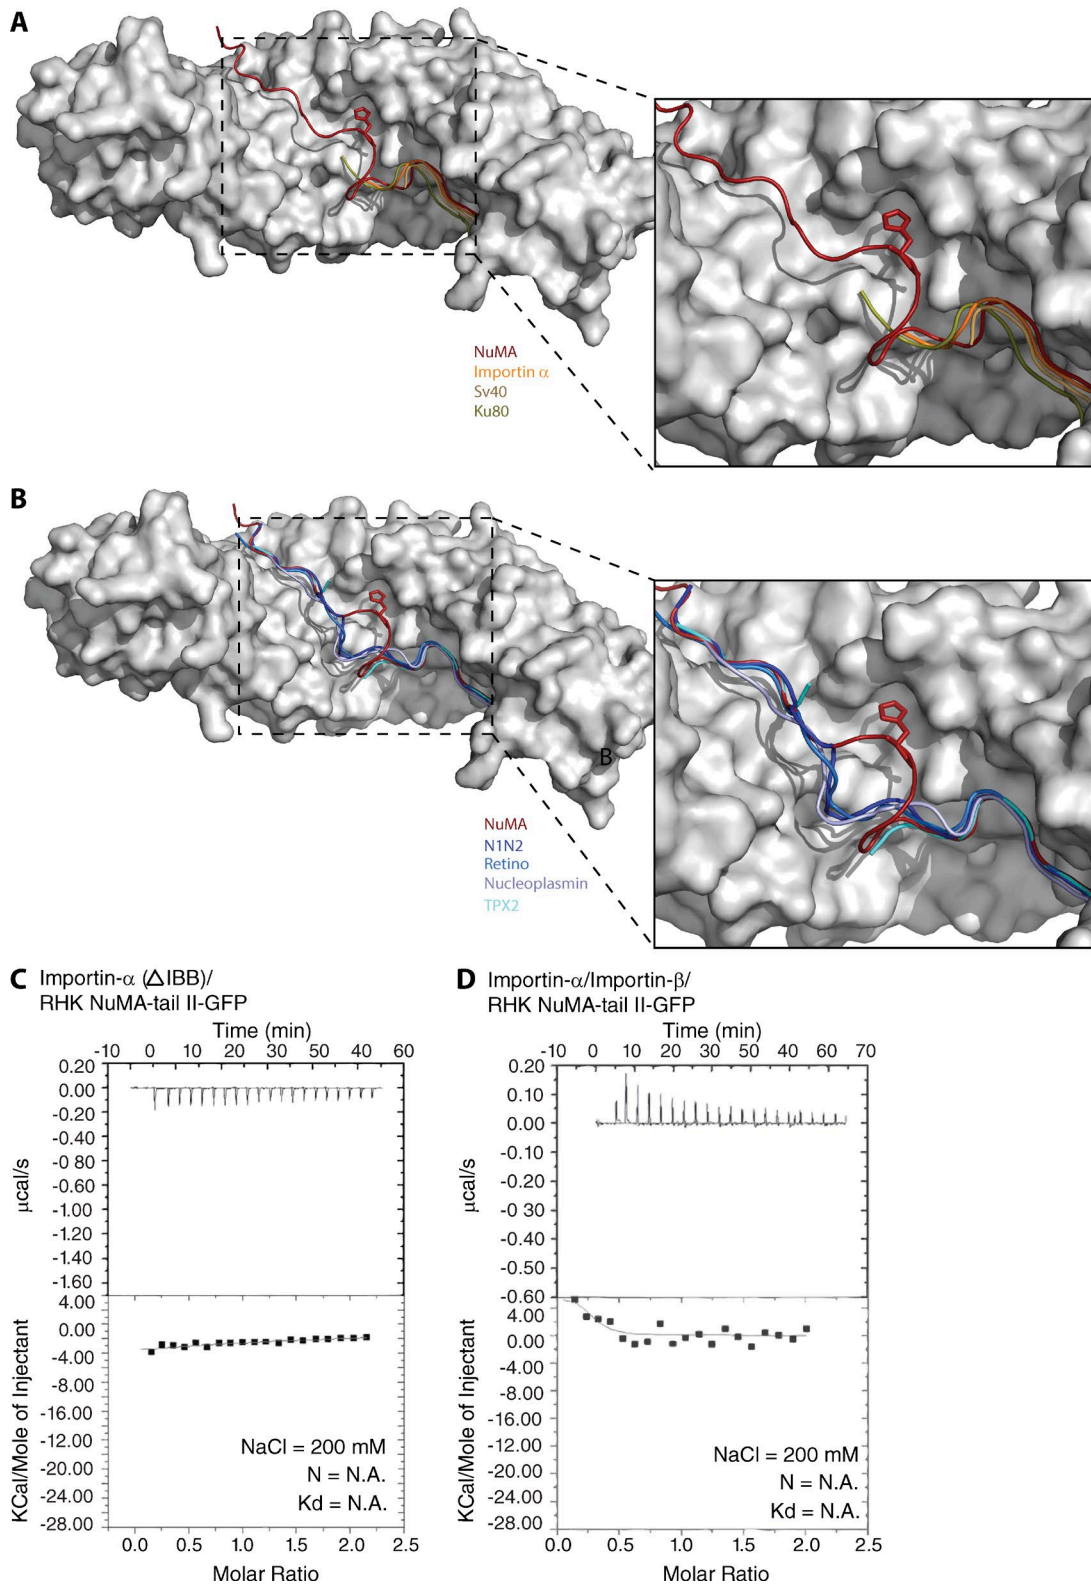

Figure S2. **Structural comparison of NuMA NLS with other classic NLS peptides.** Superimposition of the NuMA-NLS peptide (cyan) with classic monopartite NLS (A) and dipartite NLS (B) peptides. Importin- $\alpha$  (70–498) is shown in gray. Insets show an enhanced view of the overlaid NLS peptides. (C and D) ITC titration curves (top) and binding isotherms (bottom) of RHK-NuMA-tail II-GFP in the presence of Importin- $\alpha$  ( $\Delta$ IBB; C) and full-length Importin- $\alpha$ - $\beta$  (D).

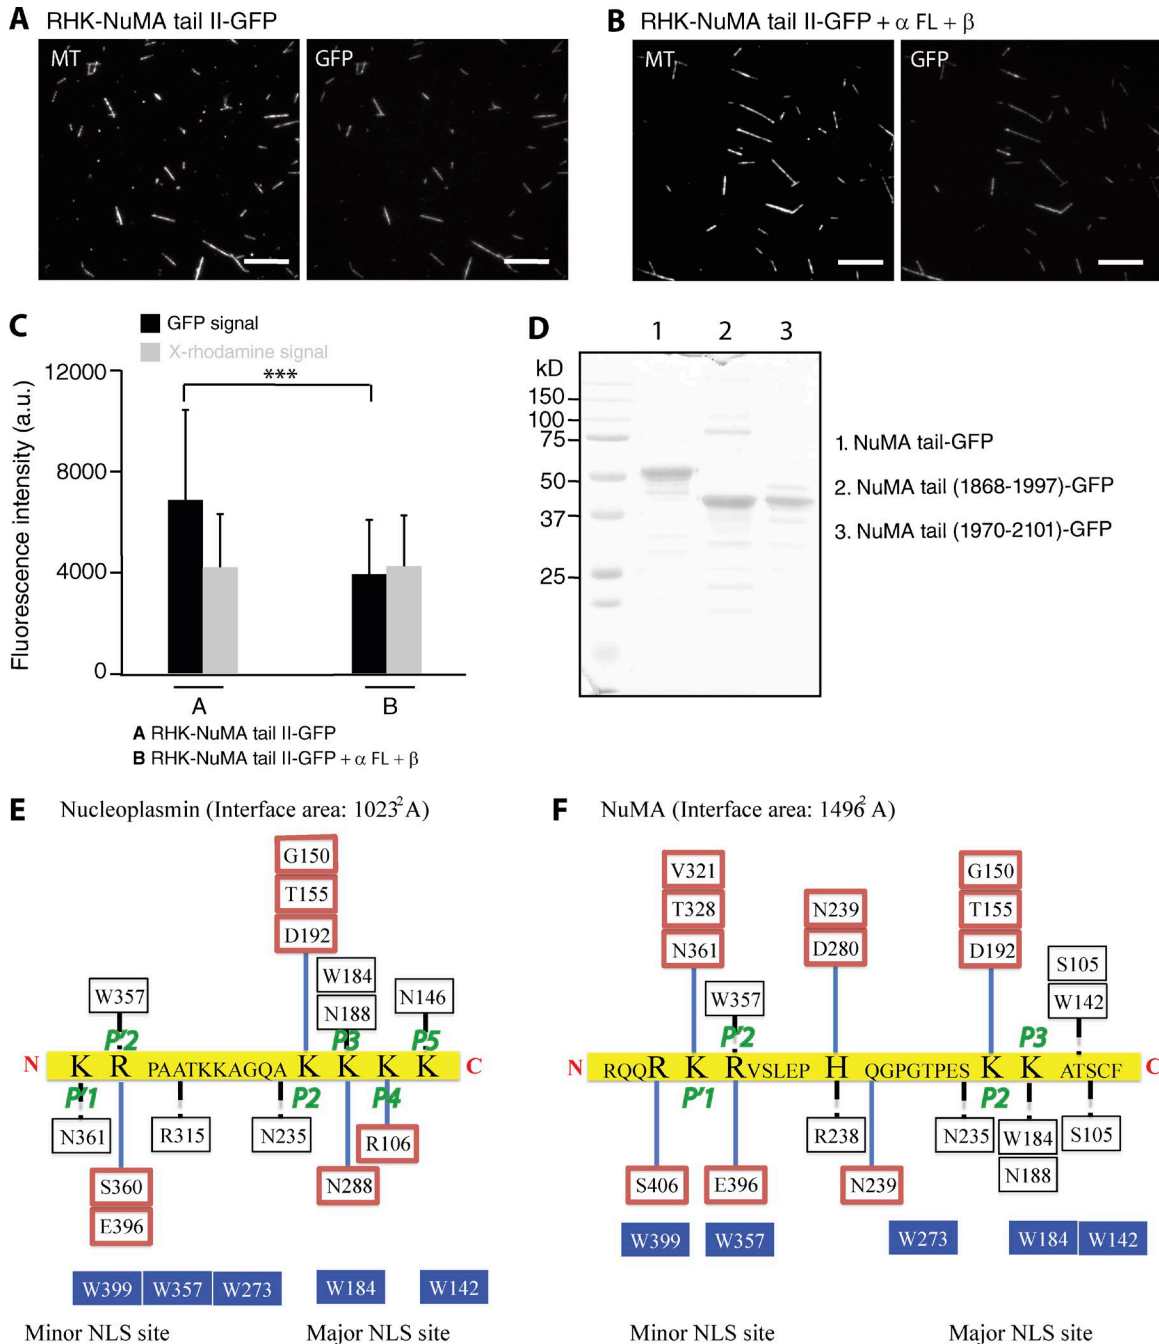

Figure S3. **The nonclassic NuMA-NLS and Importin- $\alpha$  interaction network crucial for microtubule binding.** RHK-NuMA-tail II-GFP in the absence (A) or presence (B) of full-length Importin- $\alpha$  and Importin- $\beta$ . Bars, 10  $\mu$ m. (C) Analysis of NuMA (GFP) and microtubule (rhodamine) fluorescence signals. Mean fluorescence signals under the different conditions shown in A and B were measured and plotted. SD was determined from data pooled from three independent experiments. Student *t* test; statistical differences: \*\*\*,  $P < 0.001$ . (D) 5  $\mu$ g of NuMA-tail II-GFP, NuMA-tail (1868–1991), and NuMA-tail (1970–2091) were analyzed by SDS-PAGE, followed by Coomassie blue staining. (E and F) Schematic illustration of the interaction network of Importin- $\alpha$  with nucleoplasmin and NuMA, respectively. Salt bridges are indicated by blue lines. Hydrogen bonds are shown as black dotted lines. Residues in Importin- $\alpha$  involved in hydrophobic interaction are highlighted by blue boxes.

Table S1. Crystallographic analysis of the orthorhombic crystals

| Space group                             | $P2_12_12_1$                         |
|-----------------------------------------|--------------------------------------|
| <b>Cell dimensions</b>                  |                                      |
| a, b, c (Å)                             | a = 78.1<br>b = 89.7<br>c = 101.2    |
| $\alpha, \beta, \gamma$ (°)             | $\alpha = \beta = \gamma = 90^\circ$ |
| <b>Data collection</b>                  |                                      |
| Wavelength (Å)                          | 1.5418                               |
| Resolution (Å)                          | 20.0–2.4                             |
| Total reflections                       | 161,007                              |
| Unique reflections                      | 27,965                               |
| $R_{\text{sym}}$ (%) <sup>a</sup>       | 9.2 (44.0)                           |
| CC1/2 (%) <sup>a</sup>                  | 99.9 (83.4)                          |
| $\langle I/\sigma \rangle$ <sup>a</sup> | 13.3 (2.9)                           |
| Completeness (%) <sup>a</sup>           | 98.3 (85.7)                          |
| Redundancy                              | 5.8                                  |
| <b>Refinement</b>                       |                                      |
| $R_{\text{work}}/R_{\text{free}}$ (%)   | 19.8/22.5                            |
| Bond length rmsd (Å)                    | 0.006                                |
| Bond angle rmsd (°)                     | 1.62                                 |
| Ramachandran plot (%)                   |                                      |
| Favored                                 | 95.0                                 |
| Additional allowed                      | 4.3                                  |
| Generously allowed                      | 0.8                                  |
| Disallowed                              | 0.0                                  |

rmsd, root mean square deviation.

<sup>a</sup>Highest resolution shell is shown in parentheses.
